# Supplementary material for: Strengthening Immunisation Data Systems: a mixed methods evaluation of the Lao Electronic Immunisation Registry
Source: Research Square preprint supplement (doi:10.21203/rs.3.rs-8664124/v1), 2026-02-03
Supplement: Supplementary file 1 [file 4503a60c834ea45b34e932e4.docx]

**Appendix 1: Summary of findings from health facility site observations, four purposively selected health facilities in Vientiane Province and Vientiane Capital, April 2024**

**Aim of this study component**

The primary aim of the site observations was to:

- Observe and understand the usual workflow process for capturing data using the EIR in health facilities
- Validate findings from the study survey component.

**Methods**

*Study population:*  Site observations were conducted at four purposively selected sites and involved observation of health workers during vaccination encounters.

*Time period:* Site observations were conducted from 8th to 25th April 2024.

*Data collection:* Site observations were conducted by a single data enumerator to ensure consistency of the approach. The enumerator observed 2-3 vaccination encounters and recorded the findings on a paper form. Data were tabulated by site for review and analysis.

*Data domains:* The data collection tool captured information on the physical environment, immunisation data recording tools, immunisation data recording process, physical equipment used (e.g. digital hardware), team members and roles, observed interruptions, and anything else observed that may have affected the vaccine encounter immunisation data workflow.

*Data analysis:* Narrative description of quantitative and qualitative data.

**Findings**

Encounters at four fixed-site, immunisation services were observed. All immunisation encounters occurred in a dedicated immunisation room with only the patient and immediate family or carer present.

*Workforce factors:* Vaccination team member roles and activities varied across the four sites observed. At two sites, there were two staff members involved in the vaccination encounter; one staff member managed the documentation (paper-based register and EIR), and the other staff member administered the vaccinations. At the third site, there were three staff members involved, one of whom was a temporary position funded by UNICEF dedicated to manage the EIR. At the fourth site, there were four staff members involved; however, one performed child health checks rather than immunisation activities. Only one staff member at this site was able to use the EIR.

*Data processes:* The EIR, paper-based health facility immunisation register, and child take home record were used at each observed vaccination encounter. The health facility tally sheet was used during the vaccination encounters at the two sites, but not the others. No other immunisation data recording tools were observed.

Vaccination data was almost always recorded before vaccine administration for all record types. One exception was at one site where EIR data entry occurred immediately after vaccine administration and before the next patient. Across all sites, the person administering the vaccination was not the person recording data in the paper-based health facility register or the EIR. Digital and paper-based documentation of immunisation data was managed by one or two dedicated staff members.

At one site, only two vaccination encounters were observed, and documentation of vaccination occurred outside of the room before vaccination. At the second site, many patients presented for vaccination and staff explained that that some of the children were not yet registered on the EIR despite already receiving vaccinations at a different facility. Staff also stated that some EIR records could not be located despite recalling that they had previously entered them. The data entry staff member, a nurse, appeared to be proficient at using the EIR.

At the third site, there were many nursing students present, and the room was noted be small. The students checked the documentation, however they did not record any data. At the fourth site, many patients presented for vaccinated at the same time and a substantial volume of paper-based records were observed which appeared to create confusion for staff.

*Physical and digital infrastructure:* At all observed sites, there was a range of physical and digital equipment available to support recording of immunisation data. This included the availability of desk space, pen and paper, and a power source. All sites also had an available internet connection, a laptop computer, and a smartphone. Three sites had a tablet and only one site had a desktop computer.

**Interpretation of findings**

- The immunisation workforce is dynamic with substantial variance of roles and activities performed across the observed sites. However, EIR use was not widespread amongst individual vaccination team members.
- Vaccination data was almost always recorded prior to vaccine administration and sometimes in a separate location, and typically entered by someone other than the vaccinator. This corroborates findings from the survey of EIR users at health facilities.
- Challenges for recording data included included a high volume of paper records, a high number of children presenting for vaccination, small and crowded spaces, difficulty in locating EIR records.
- Physical and digital infrastructure appeared to be sufficient at the observed sites.
