# Supplementary material for: Strengthening Immunisation Data Systems: a mixed methods evaluation of the Lao Electronic Immunisation Registry
Source: Research Square preprint supplement (doi:10.21203/rs.3.rs-8664124/v1), 2026-02-03

**Appendix 2: Number of vaccines recorded in the health facility register, district-level report and the EIR, four purposively selected health facilities in Vientiane Province and Vientiane Capital, November 2023 to January 2024**

| **Data source** | **Vaccine type** | | | |
| --- | --- | --- | --- | --- |
| **Hepatitis B birth dose** | **Penta1** | **MCV1** | **All three vaccines** |
| Health facility register | 415 | 179 | 128 | 722 |
| District-level report | 548 | 246 | 173 | 967 |
| EIR | 565 | 275 | 186 | 1026 |

EIR = Electronic immunisation register; MCV1 = first dose of measles-containing vaccine; Penta1: first dose of pentavalent vaccine


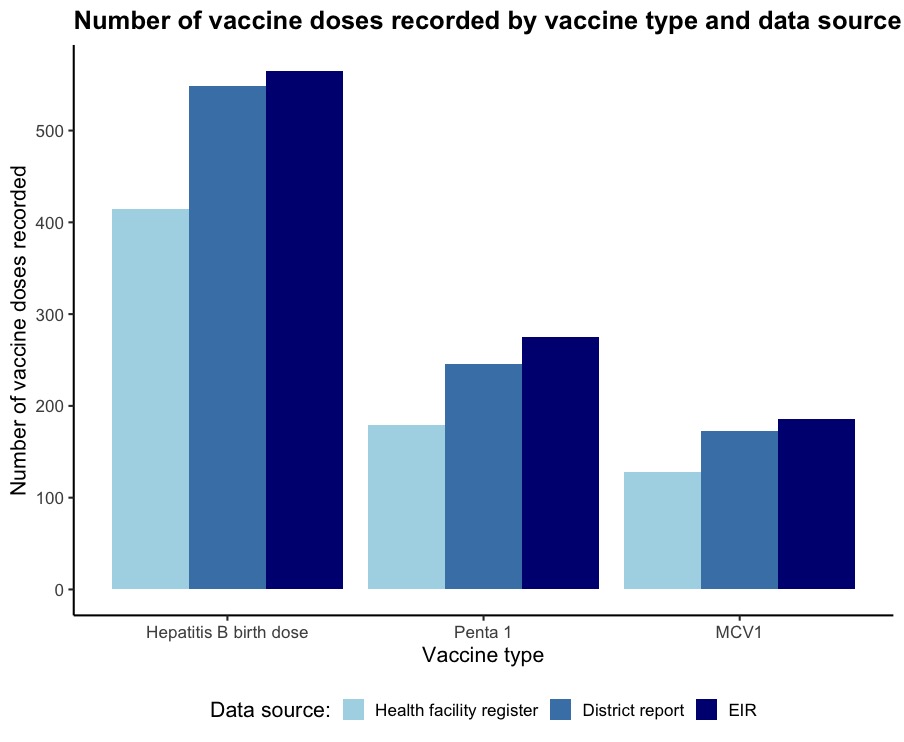

Supplement: Supplementary file 2 [file 473886c801fbe6b0ef6cc64d.docx]
